# Supplementary material for: Red, green, and blue quantum dot LEDs with solution processable ZnO nanocrystal electron injection layers
Source: Royal Society of Chemistry journal article supplement (doi:10.1039/b800028j), 2008-01-01
Supplement: b800028j.pdf [file b800028j.pdf]

## Supporting information

Red, green, and blue quantum dot LEDs with solution processable ZnO nanocrystal electron injection layers

*Jan W. Stouwdam and René A. J. Janssen*

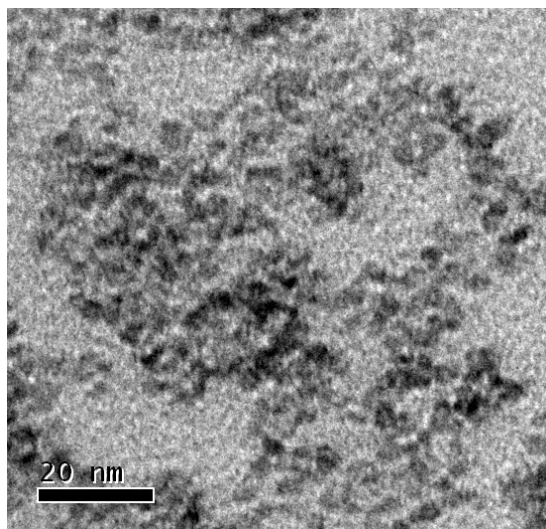

**Figure S1.** TEM picture of ZnO nanocrystals

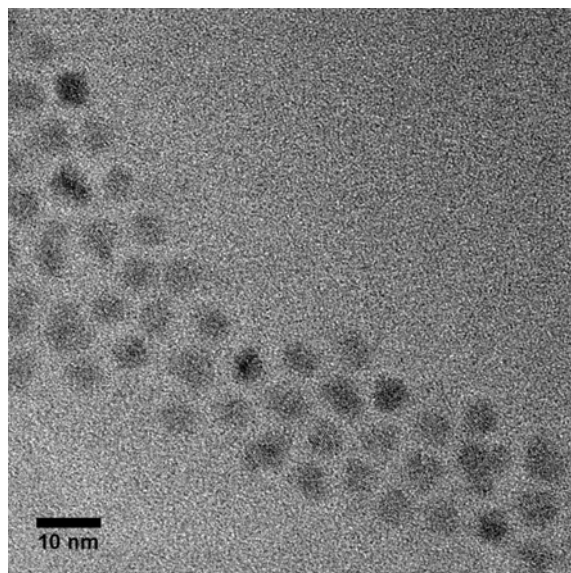

**Figure S2.** TEM picture of CdSe/ZnS core shell nanocrystals with an emission maximum of 620 nm.

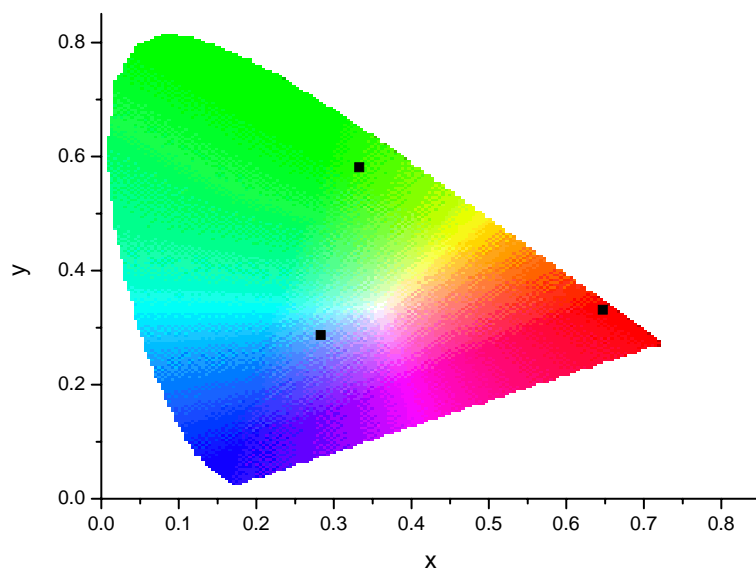

**Figure S3.** Plot with the CIE coordinates of the blue, green and red emitting QD-LEDs.
